# Supplementary material for: Real-time drug release monitoring from pH-responsive CuS-encapsulated metal–organic frameworks
Source: Royal Society of Chemistry journal article supplement (doi:10.1039/d1ra09320g), 2022-01-01
Supplement: d1ra09320g1.pdf [file d1ra09320g1.pdf]

## Real-Time Drug Release Monitoring from pH-Responsive CuS-encapsulated Metal-Organic Frameworks

Bei Liu,<sup>a</sup> Lirong Sun,<sup>a</sup> Xijian Lu,<sup>a</sup> Yuping Yang,<sup>a</sup> Hongshang Peng,<sup>a</sup> Zhaogang Sun,<sup>b\*</sup> Juan Xu<sup>\*c</sup> and Hongqian Chu<sup>\*b</sup>

<sup>a</sup> College of Science, Minzu University of China, Beijing, 100081, China

<sup>b</sup> Translational Medicine Center, Beijing Chest Hospital, Capital Medical University / Beijing Tuberculosis and Thoracic Tumor Research Institute, Beijing 101149, China

<sup>c</sup> National Research Institute for Family Planning, Beijing, 100005, China

\*Address correspondence to Zhaogang Sun, sunzhaogang@bjxkyy.cn; Juan Xu, xujuan@nrfp.org.cn; Hongqian Chu, chuhongqian@bjxkyy.cn.

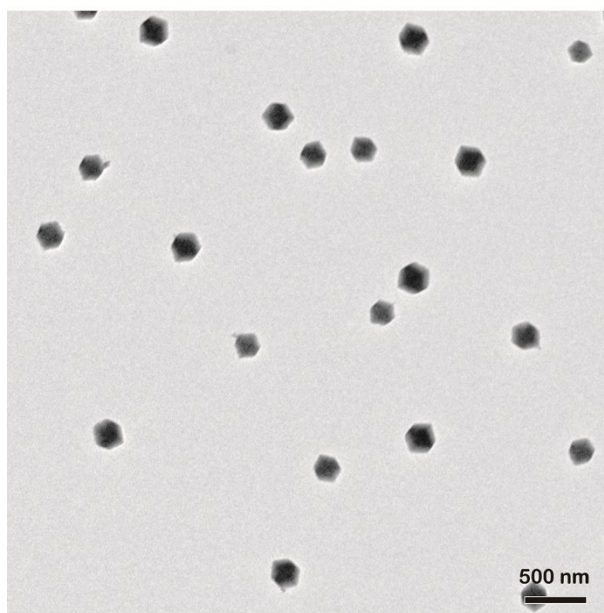

Fig. S1 TEM images of ZIF-8.

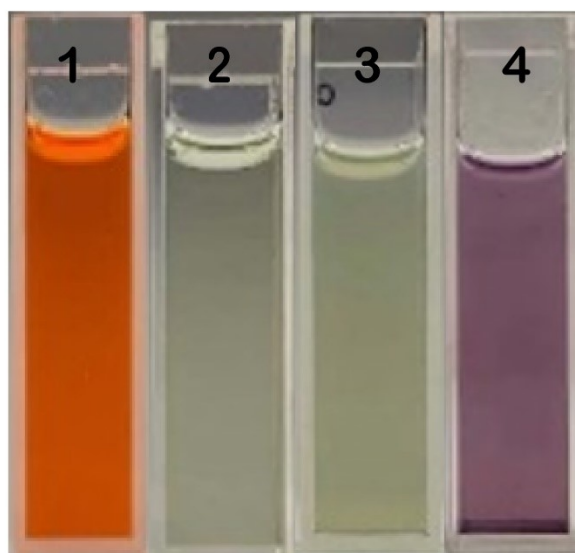

Fig. S2 The photographs of 1: DOX, 2: CuS, 3: CuS@ZIF and 4: CuS/D@Z samples.

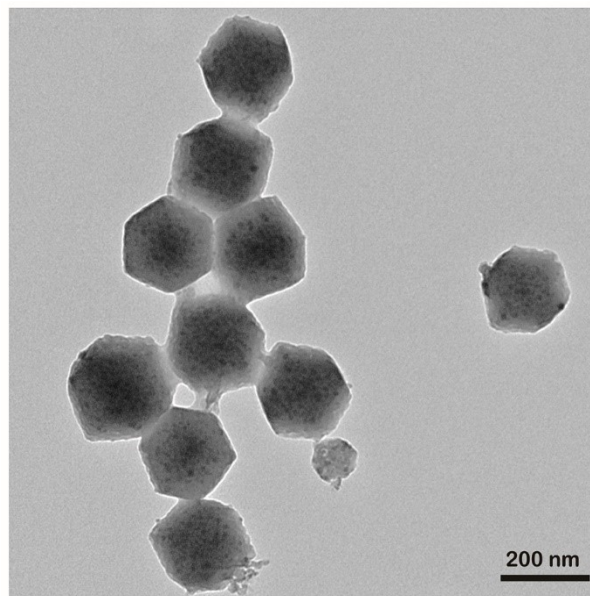

Fig. S3 TEM images of CuS/D@Z-FA.

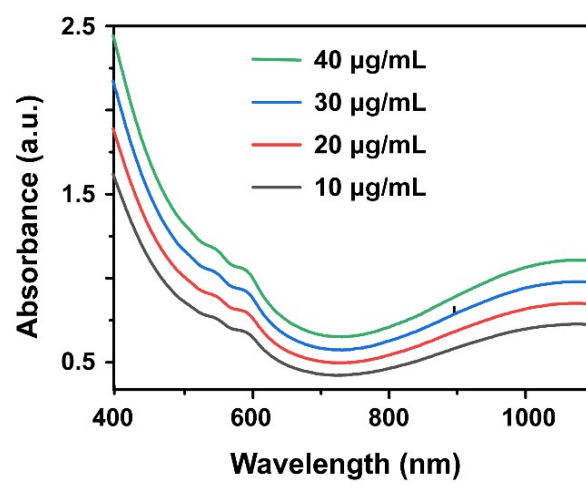

Fig S4 Absorption spectrum of different concentrations of CuS/D@Z-FA.

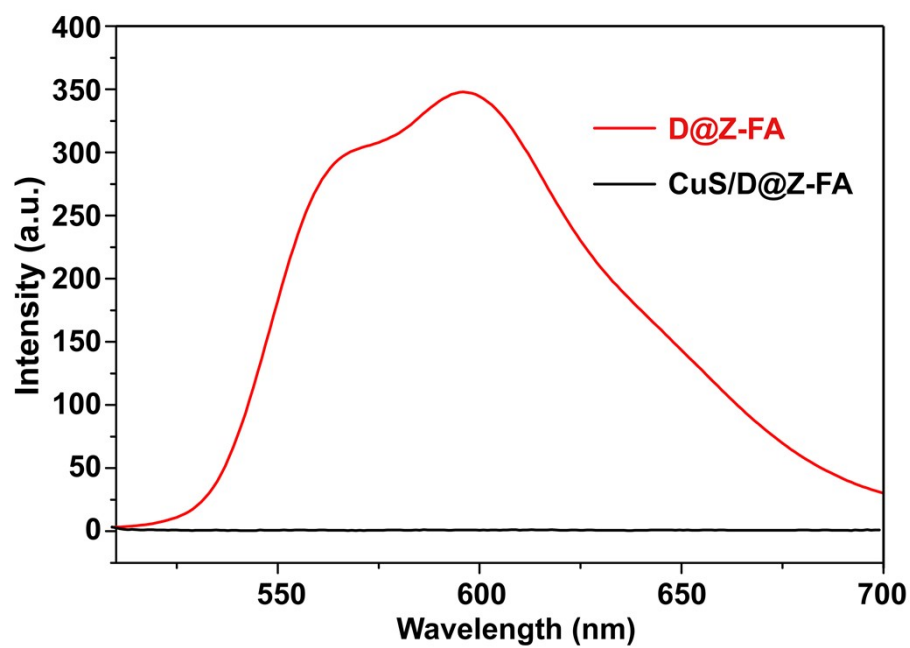

Fig S5 DOX fluoresce of D@Z-FA and CuS/D@Z-FA.

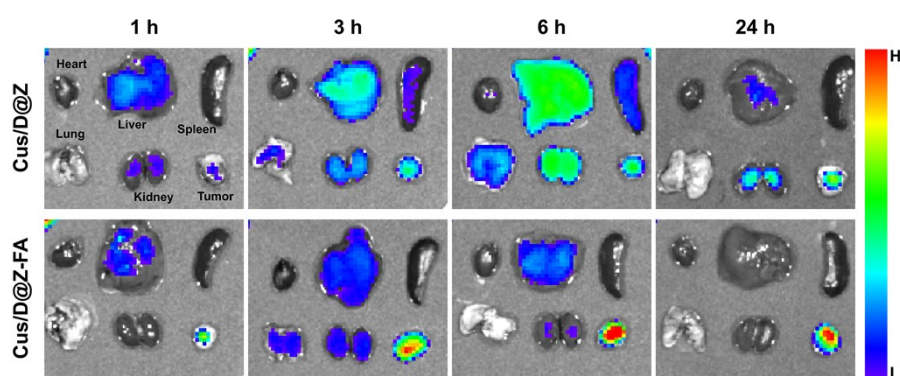

Fig S6 Representative time-dependent in vivo fluorescence imaging of tumor-bearing mice after exposure to CuS/D@Z and CuS/D@Z-FA.  $\lambda_{ex}$  640 nm,  $\lambda_{em}$ =680 nm. Cy5 was loaded into CuS/D@Z and CuS/D@Z-FA.

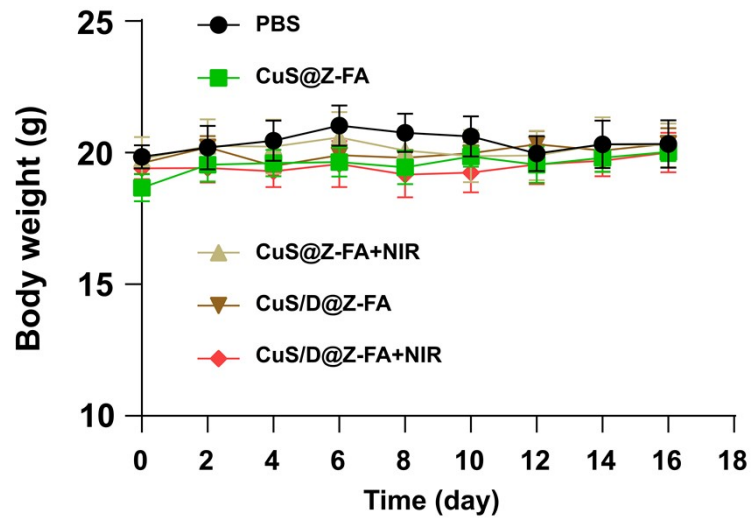

Fig S7 Body weight of treated mice during the experiment period.

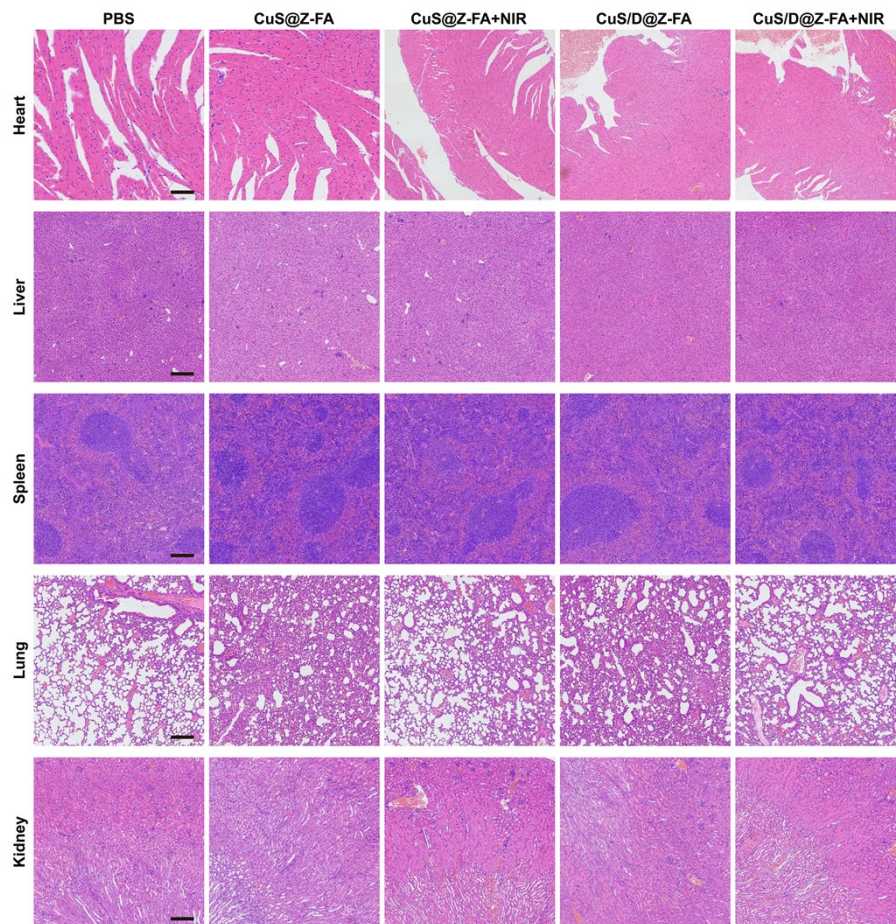

Fig S8 Histological assessments of tissues using H&E staining in the different treatment groups. Scale bars, 100 μm.

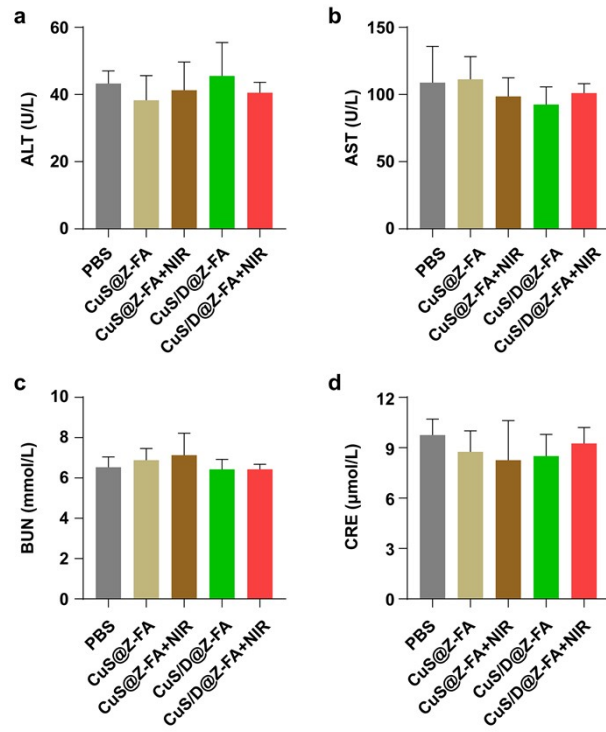

**Fig S9** Serum ALT, AST, BUN and CRE levels in the different treatment groups. The data are presented as the mean  $\pm$ SD (n = 5).
